# Supplementary material for: Insertion of Epicatechin Gallate into the Cytoplasmic Membrane of Methicillin-resistant Staphylococcus aureus Disrupts Penicillin-binding Protein (PBP) 2a-mediated β-Lactam Resistance by Delocalizing PBP2
Source: PubMed Central journal article supplement — J Biol Chem. 2010 Jun 1;285(31):24055–65. doi: 10.1074/jbc.M110.114793 (PMC2911331; doi:10.1074/jbc.m110.114793), 2010-06-01
Supplement: supp_M110.114793_jbc.M110.114793-1.pdf [file supp_M110.114793_jbc.M110.114793-1.pdf]

### Supplemental data – Bernal et al. 2010

Validation of microarray data by qRT-PCR: nine genes shown to be significantly (>twofold) up-regulated by microarray analysis and two genes not significantly (<twofold) modulated were selected for validation. The correlation between the two methods is shown in the graph.

| <u>ORF</u> | <u>Microarray</u> | <u>qRT-PCR</u> |
|------------|-------------------|----------------|
| SAR2586    | <2                | 0.75           |
| SAR2184    | 4.45              | 4.35           |
| SAR1730    | 6.95              | 15.00          |
| SAR0580    | <2                | 1.42           |
| SAR0581    | 2.7               | 1.67           |
| SAR1932    | 4.77              | 15.72          |
| SAR2442    | 3.73              | 21.70          |
| SAR1964    | 5.47              | 9.73           |
| SAR1975    | 8.05              | 13.93          |
| SAR1374    | 2.84              | 2.53           |
| SAR0584    | 24.2              | 206            |

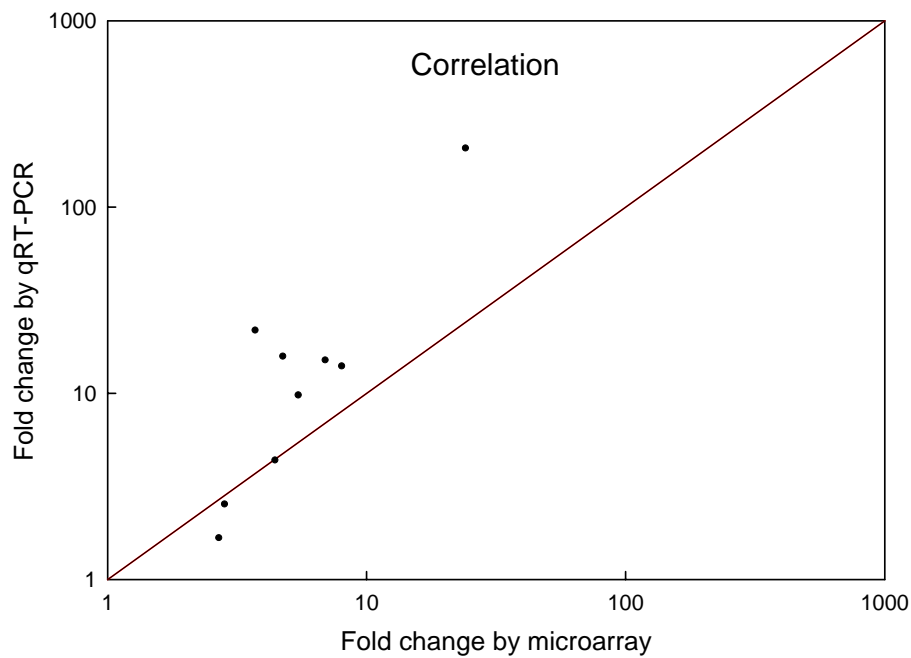

$R^2 = 0.9448$

$p = 0.0000121$
